# Supplementary material for: Orientational order induced mode switching at coupled interfaces of a nematic–isotropic free bilayer
Source: Royal Society of Chemistry journal article supplement (doi:10.1039/d5sm00634a), 2025-11-03
Supplement: d5sm00634a1.pdf [file d5sm00634a1.pdf]

## **Supplementary Information (SI)**

### **Orientalional Order Induced Mode Switching at Coupled Interfaces of Nematic-Isotropic Free Bilayer**

Vinod Babasaheb Vanarse<sup>1</sup>, Neeru Yadav<sup>1</sup>, Srijita De<sup>2</sup>, Abir Ghosh<sup>3</sup>, Tapas Kumar  
Mandal<sup>1,2,4</sup>, Dipankar Bandyopadhyay<sup>1,2,4</sup> @

<sup>1</sup>Department of Chemical Engineering, Indian Institute of Technology, Guwahati 781039,  
Assam, India.

<sup>2</sup>Centre for Nanotechnology, Indian Institute of Technology, Guwahati 781039, Assam,  
India.

<sup>3</sup>Department of Chemical Engineering and Technology, Indian Institute of Technology  
(BHU) Varanasi, Varanasi 221005, India

<sup>4</sup>Jyoti and Bhupat Mehta School of Health Sciences and Technology, Indian Institute of  
Technology, Guwahati 781039, Assam, India

@Email address for correspondence: [dipban@iitg.ac.in](mailto:dipban@iitg.ac.in)

#### **Appendix A**

##### **Mass conservation and equation of motion**

Momentum balance equation for layer 1:

$$\rho_1 \left( \frac{D\mathbf{v}}{Dt} \right) = \nabla \cdot (-p_1 \mathbf{I}) + \nabla \cdot \boldsymbol{\tau} \quad (\text{A1})$$

where,

$$\boldsymbol{\tau} = \mu_1 (\nabla \mathbf{u} + (\nabla \mathbf{u})^T)$$

After applying the scaling rules the x and z direction momentum balance equations are respectively modified to,

$$\frac{\partial P_1}{\partial x} = \mu_1 \left( \frac{\partial^2 u_1}{\partial z^2} \right) \quad (\text{A2})$$

$$\frac{\partial P_1}{\partial z} = 0 \quad (\text{A3})$$

**NLC description:** The couple balance or the angular momentum balance equation for NLC

$$\lambda \mathbf{n} - \frac{\partial E_f}{\partial \mathbf{n}} + \nabla \cdot \left( \frac{\partial E_f}{\partial \nabla \mathbf{n}} \right) + \mathbf{G} + \mathbf{g} = 0 \quad (\text{A4})$$

As there is no external field, therefore  $\mathbf{G} = 0$  and  $\mathbf{g} = -\lambda_1 \mathbf{N} - \lambda_2 (\mathbf{e} \cdot \mathbf{n})$  where,  $\mathbf{N}$  is the rotation vector and can be expressed as,  $\mathbf{N} = \dot{\mathbf{n}} - \boldsymbol{\omega} \cdot \mathbf{n}$ , whereas,  $\boldsymbol{\omega}$  is the spin tensor,  $\boldsymbol{\omega} = 0.5(\nabla \mathbf{u} - \nabla \mathbf{u}^T)$  and  $\mathbf{e}$  is the strain tensor, which is  $\mathbf{e} = 0.5(\nabla \mathbf{u} + \nabla \mathbf{u}^T)$ .

After expanding the x and z direction components and applying scaling laws the final angular momentum balance equation reads as follows,

$$-K_f \left( \frac{\partial^2 \theta}{\partial z^2} \right) = 0 \quad (\text{A5})$$

Momentum balance equation for NLC-layer 2:

$$\rho_2 \left( \frac{D\mathbf{v}}{Dt} \right) = \nabla \cdot (-p_2 \mathbf{I}) + \nabla \cdot \boldsymbol{\tau}^V + \nabla \cdot \boldsymbol{\tau}^E \quad (\text{A6})$$

The term  $\boldsymbol{\tau}^V$  in Eq. (6) is associated with the viscous stress tensor for the NLC film,

$$\boldsymbol{\tau}^V = \alpha_1 \mathbf{e} : \mathbf{n} \mathbf{n} \mathbf{n} \mathbf{n} + \alpha_2 \mathbf{n} \mathbf{N} + \alpha_3 \mathbf{n} \mathbf{N} + \alpha_4 \mathbf{e} + \alpha_5 \mathbf{n} \mathbf{n} \cdot \mathbf{e} + \alpha_6 \mathbf{e} \cdot \mathbf{n} \mathbf{n}$$

where,  $\mathbf{e}_{ij} = \frac{1}{2} \left( \frac{\partial u_i}{\partial x_j} + \frac{\partial u_j}{\partial x_i} \right)$ ,  $\mathbf{N}_i = \frac{D\mathbf{n}_i}{Dt} - \mathbf{w}_{ik} \mathbf{n}_k$  and  $\mathbf{w}_{ij} = \frac{1}{2} \left( \frac{\partial u_i}{\partial x_j} - \frac{\partial u_j}{\partial x_i} \right)$ , respectively.

The viscous stress tensor is expressed as  $\boldsymbol{\tau}^V = \begin{bmatrix} \tau_{xx} & \tau_{xz} \\ \tau_{zx} & \tau_{zz} \end{bmatrix}$ , where the matrix components are

$$\tau_{xx} = a_1 \frac{\partial u}{\partial x} + a_2 \frac{\partial u}{\partial z} + a_3 \frac{\partial w}{\partial x} + a_4 \frac{\partial w}{\partial z} + a_5 \frac{D\theta}{Dt} \quad (\text{A7})$$

$$\tau_{xz} = b_1 \frac{\partial u}{\partial x} + b_2 \frac{\partial u}{\partial z} + b_3 \frac{\partial w}{\partial x} + b_4 \frac{\partial w}{\partial z} + b_5 \frac{D\theta}{Dt} \quad (\text{A8})$$

$$\tau_{zx} = c_1 \frac{\partial u}{\partial x} + c_2 \frac{\partial u}{\partial z} + c_3 \frac{\partial w}{\partial x} + c_4 \frac{\partial w}{\partial z} + c_5 \frac{D\theta}{Dt} \quad (\text{A9})$$

$$\tau_{zz} = d_1 \frac{\partial u}{\partial x} + d_2 \frac{\partial u}{\partial z} + d_3 \frac{\partial w}{\partial x} + d_4 \frac{\partial w}{\partial z} + d_5 \frac{D\theta}{Dt} \quad (\text{A10})$$

The variables  $a_i, b_i, c_i$  and  $d_i$  utilized in Eq's. (A7–A10) are given below:

$$a_1 = [\alpha_1 \sin^4 \theta + \alpha_4 + (\alpha_5 + \alpha_6) \sin^2 \theta], \quad (\text{A11})$$

$$a_2 = \sin \theta \cos \theta \left[ \alpha_1 \sin \theta \cos \theta + \frac{1}{2} (\alpha_5 + \alpha_6 - \alpha_2 - \alpha_3) \right], \quad (\text{A12})$$

$$a_3 = \sin \theta \cos \theta \left[ \alpha_1 \sin \theta \cos \theta + \frac{1}{2} (\alpha_5 + \alpha_6 + \alpha_2 + \alpha_3) \right], \quad (\text{A13})$$

$$a_4 = [\alpha_1 \sin^2 \theta \cos^2 \theta], \quad (\text{A14})$$

$$a_5 = [\alpha_1 + \alpha_3] \sin \theta \cos \theta, \quad (\text{A15})$$

$$b_1 = \sin \theta \cos \theta [\alpha_1 \sin^2 \theta + \alpha_5], \quad (\text{A16})$$

$$b_2 = \left[ \alpha_1 \sin^2 \theta \cos^2 \theta + \frac{\alpha_4}{2} + \frac{\cos^2 \theta}{2} (\alpha_5 - \alpha_2) + \frac{\sin^2 \theta}{2} (\alpha_6 + \alpha_3) \right], \quad (\text{A17})$$

$$b_3 = \left[ \alpha_1 \sin^2 \theta \cos^2 \theta + \frac{\alpha_4}{2} + \frac{\cos^2 \theta}{2} (\alpha_5 + \alpha_2) + \frac{\sin^2 \theta}{2} (\alpha_6 - \alpha_3) \right], \quad (\text{A18})$$

$$b_4 = \sin \theta \cos \theta [\alpha_1 \cos^2 \theta + \alpha_6], \quad (\text{A19})$$

$$b_5 = [\alpha_2 \cos^2 \theta - \alpha_3 \sin^2 \theta], \quad (\text{A20})$$

$$c_1 = \sin \theta \cos \theta [\alpha_1 \sin^2 \theta + \alpha_6], \quad (\text{A21})$$

$$c_2 = \left[ \alpha_1 \sin^2 \theta \cos^2 \theta + \frac{\alpha_4}{2} + \frac{\cos^2 \theta}{2} (\alpha_6 - \alpha_3) + \frac{\sin^2 \theta}{2} (\alpha_2 + \alpha_5) \right], \quad (\text{A22})$$

$$c_3 = \left[ \alpha_1 \sin^2 \theta \cos^2 \theta + \frac{\alpha_4}{2} + \frac{\cos^2 \theta}{2} (\alpha_3 + \alpha_6) + \frac{\sin^2 \theta}{2} (\alpha_5 - \alpha_2) \right], \quad (\text{A23})$$

$$c_4 = \sin \theta \cos \theta [\alpha_1 \cos^2 \theta + \alpha_5], \quad (\text{A24})$$

$$c_5 = [\alpha_3 \cos^2 \theta - \alpha_2 \sin^2 \theta], \quad (\text{A25})$$

$$d_1 = [\alpha_1 \sin^2 \theta \cos^2 \theta], \quad (\text{A26})$$

$$d_2 = \sin \theta \cos \theta \left[ \alpha_1 \cos^2 \theta + \frac{1}{2} (\alpha_5 + \alpha_6 + \alpha_2 + \alpha_3) \right], \quad (\text{A27})$$

$$d_3 = \sin \theta \cos \theta \left[ \alpha_1 \cos^2 \theta + \frac{1}{2} (\alpha_5 + \alpha_6 - \alpha_2 - \alpha_3) \right], \quad (\text{A28})$$

$$d_4 = [\alpha_1 \cos^4 \theta + \alpha_4 + (\alpha_5 + \alpha_6) \cos^2 \theta], \quad (\text{A29})$$

$$d_5 = [\alpha_2 \cos^2 \theta - \alpha_3 \sin^2 \theta]. \quad (\text{A30})$$

Similarly, the elastic (Ericksen) stress tensor for the NLC film  $\boldsymbol{\tau}^E$  describes as,

$$\boldsymbol{\tau}^E = - \left( \frac{\partial E_f}{\partial \nabla \mathbf{n}} \right) \cdot (\nabla \mathbf{n})^T \quad (\text{A31})$$

where,  $E_f = \frac{K_f}{2} [(\nabla \cdot \mathbf{n})^2 + (\mathbf{n} \times \nabla \times \mathbf{n})^2] = \frac{K_f}{2} [(\nabla \mathbf{n}) : (\nabla \mathbf{n})^T]$ , therefore on simplification,

Eq. (11) takes the form as follows,

$$\boldsymbol{\tau}^E = -K_f [(\nabla \mathbf{n}) \cdot (\nabla \mathbf{n})^T] = -K_f \begin{bmatrix} \left( \frac{\partial \theta}{\partial x} \right)^2 & \left( \frac{\partial \theta}{\partial x} \right) \left( \frac{\partial \theta}{\partial z} \right) \\ \left( \frac{\partial \theta}{\partial z} \right) \left( \frac{\partial \theta}{\partial x} \right) & \left( \frac{\partial \theta}{\partial z} \right)^2 \end{bmatrix} \quad (\text{A32})$$

After considering the scaling parameters, and performing all the simplifications, final forms of momentum balance equations for the x and z directions take the following forms,

$$\frac{\partial}{\partial x} \left( P_2 + \frac{K_f}{2} \left( \frac{\partial \theta}{\partial z} \right)^2 \right) = \frac{\partial}{\partial z} \left( c_2 \frac{\partial u_2}{\partial z} \right) \quad (\text{A33})$$

$$\frac{\partial}{\partial z} \left( P_2 + \frac{K_f}{2} \left( \frac{\partial \theta}{\partial z} \right)^2 \right) = 0 \quad (\text{A34})$$

## Appendix B

### Boundary conditions and thin film evolution equations:

The integration of the momentum Eq. (A2) gives,

$$\mu_1 \left( \frac{\partial u_1}{\partial z} \right) = \frac{\partial P_1}{\partial x} z + C_1 \quad (\text{B35})$$

$$\mu_1 u_1 = \frac{\partial P_1}{\partial x} z^2 + C_1 z + C_2 \quad (\text{B36})$$

where,  $C_1, C_2$  are integration constants.

Boundary condition at  $z = 0$ ,  $u_1 = w_1 = 0$  (no slip and impermeable boundary conditions) lead to  $C_2 = 0$ . Utilizing the boundary condition at  $z = h_1$ , (tangential stress balance) lead to

$$c_2 \left( \frac{\partial u_2}{\partial z} \right) = \mu_1 \frac{\partial u_1}{\partial z} \quad (\text{B37})$$

where,

$$c_2 = \alpha_1 \sin^2 \theta \cos^2 \theta + \frac{\alpha_4}{2} + \frac{\cos^2 \theta}{2} (\alpha_6 - \alpha_3) + \frac{\sin^2 \theta}{2} (\alpha_2 + \alpha_5)$$

Applying tangential boundary condition, which leads to,

$$C_1 = \frac{\partial P_{2LC}}{\partial x} (h_1 - h_2) - \frac{\partial P_1}{\partial x} h_1 \quad (\text{B38})$$

where,

$$P_{2LC} = P_2 + \frac{K_f}{2} \left( \frac{\partial \theta}{\partial z} \right)^2$$

On inserting the obtained integration constants, we obtain the velocity  $u_1$  as,

$$(u_1)_{h_1} = \frac{1}{\mu_1} \left[ \frac{\partial P_{2LC}}{\partial x} (h_1 - h_2) z + \frac{\partial P_1}{\partial x} \left( \frac{z^2}{2} - h_1 z \right) \right] \quad (\text{B39})$$

where,  $(u_1)_{h_1}$  is the  $u_1$  solved at  $h_1$  height.

Differentiating Eq. (19) with respect to  $z$  leads to,

$$\left( \frac{\partial u_1}{\partial z} \right)_{h_1} = \frac{1}{\mu_1} \left[ \frac{\partial P_{2LC}}{\partial x} (h_1 - h_2) + \frac{\partial P_1}{\partial x} (z - h_1) \right] \quad (\text{B40})$$

The momentum balance equation for layer-2 for the  $x$  and  $z$  directions, respectively

$$\frac{\partial}{\partial x} (P_{2LC}) = \frac{\partial}{\partial z} \left( c_2 \frac{\partial u_2}{\partial z} \right) \quad (\text{B41})$$

$$\frac{\partial}{\partial z} (P_{2LC}) = 0 \quad (\text{B42})$$

The integration of these momentum equations gives,

$$c_2 \left( \frac{\partial u_2}{\partial z} \right) = \frac{\partial P_{2LC}}{\partial x} z + C_3 \quad (\text{B43})$$

with  $p_{2LC}$  is constant in the  $z$ -direction.

Boundary condition at  $z = h_2$ , (tangential stress balance) suggests that  $\frac{\partial u_2}{\partial z} = 0$ , which gives

$C_3 = \frac{\partial P_{2LC}}{\partial x} h_2$  and on simplification it turns out to be,

$$\left( \frac{\partial u_2}{\partial z} \right)_{h_2} = \frac{\partial P_{2LC}}{\partial x} \left( \frac{z - h_2}{c_2} \right) \quad (\text{B44})$$

The thin film equation for layer 1 is described as,

$$\frac{\partial h_1}{\partial t} + \frac{\partial}{\partial x} \int_0^{h_1} \left( \frac{\partial u_1}{\partial z} \right)_{h_1} (h_1 - z) dz = 0 \quad (\text{B45})$$

After inserting, solving and on simplification Eq. (A25) leads to following form,

$$\begin{aligned} \frac{\partial h_1}{\partial t} - \frac{\partial^2 P_{2LC}}{\partial x^2} \left( \frac{h_1^2 h_2 - h_1^3}{2\mu_1} \right) - \frac{\partial^2 P_1}{\partial x^2} \left( \frac{h_1^3}{2\mu_1} \right) - \frac{\partial P_1}{\partial x} \left( \frac{h_1^2}{\mu_1} \frac{\partial h_1}{\partial x} \right) \\ + \frac{\partial P_{2LC}}{\partial x} \left( \frac{\partial h_1}{\partial x} \left( \frac{3h_1^2 - 2h_1 h_2}{2\mu_1} \right) - \frac{\partial h_2}{\partial x} \left( \frac{h_1^2}{2\mu_1} \right) \right) = 0 \end{aligned} \quad (\text{B46})$$

Similarly, the thin film equation for layer 2 reads as follows,

$$\frac{\partial (h_2 - h_1)}{\partial t} + \frac{\partial}{\partial x} \left[ \left( \int_{h_1}^{h_2} \left( \frac{\partial u_2}{\partial z} \right)_{h_2} (h_2 - z) dz \right) + (h_2 - h_1)(u_2)_{h_1} \right] = 0 \quad (\text{B47})$$

At  $z = h_1$ :  $(u_2)_{h_1} = (u_1)_{h_1}$

On integrating the Eq. (A27), it takes the form as follows,

$$\begin{aligned} \frac{\partial h_2}{\partial t} - \frac{\partial^2 P_1}{\partial x^2} \left( \frac{h_1^2 h_2 - h_1^3}{2\mu_1} + \frac{h_1^3}{3\mu_1} \right) \\ - \frac{\partial^2 P_{2LC}}{\partial x^2} \left( \frac{h_1^2 h_2 - h_1^3}{2\mu_1} + \frac{h_1^3 - 2h_1^2 h_2 + h_2^2 h_1}{\mu_1} + \left( \frac{h_1 - h_2}{\theta_1 - \theta_2} \right)^3 \frac{I_1}{\mu_2} \right) \\ + \frac{\partial P_{2LC}}{\partial x} \frac{\partial}{\partial x} \left( - \left( \frac{h_1 - h_2}{\theta_1 - \theta_2} \right)^3 \frac{I_1}{\mu_2} - \frac{h_1^3 - 2h_1^2 h_2 + h_2^2 h_1}{\mu_1} \right. \\ \left. + \frac{h_1^2}{2\mu_1} (h_1 - h_2) \right) + \frac{\partial P_1}{\partial x} \frac{\partial}{\partial x} \left( \frac{-h_1^2 h_2 + h_1^3}{2\mu_1} - \frac{h_1^3}{3\mu_1} \right) = 0 \end{aligned} \quad (\text{B48})$$

where,  $I_1 = \int_{\theta_1}^{\theta_2} \frac{(\theta - \theta_2)^2}{(K_1 + K_2 \sin^2 \theta + K_3 \sin^4 \theta)} d\theta$ ;  $K_1 = \frac{\alpha_4 - \alpha_3 + \alpha_6}{\alpha_4}$ ;  $K_2 = \frac{2\alpha_1 + \alpha_2 + \alpha_5 + \alpha_3 - \alpha_6}{\alpha_4}$ ;  $K_3 = -\frac{2\alpha_1}{\alpha_4}$ ,  
and  $\theta = \theta_2 + \frac{\theta_2 - \theta_1}{h_2 - h_1} (z - h_2)$ . The NLC bulk viscosity is defined by  $\mu_2 = 0.5\alpha_4$ , where,  $\alpha_4$  is the fourth Leslie coefficient.

## Appendix C

### Micro-thin film linear stability analysis

The total pressure at NW interface is  $P_1 = p_1 - \Pi_1$  and  $\Pi_1$  is the disjoining pressure at the liquid-NLC interface. Similarly, the total pressure at NI surface is  $P_2 = p_2 - \Pi_2$  and  $\Pi_2$  is the disjoining pressure at the NI surface. The disjoining pressure is defined in terms of Gibbs free energy  $\left(\Pi = -\frac{\partial(\Delta G_E^{LW})}{\partial h}\right)$  as follows,

$$\Delta G_E^{LW} = \frac{-A_{11} + A_{1s} - A_{2s} + A_{12}}{12\pi h_1^2} + \frac{-A_{22} + A_{12}}{12\pi h_3^2} + \frac{A_{2s} - A_{12}}{12\pi(h_1 + h_3)^2} + \frac{K_f \theta^2}{2h_3} \quad (C49)$$

Here,

$$p_1 = p_0 - \gamma_2 h_{2xx} - \gamma_{12} h_{1xx} \text{ and} \\ \Pi_1 = -\frac{A_2}{6\pi h_1^3} + \frac{A_3}{6\pi h_2^3} \quad (C50)$$

where,  $h_{2xx} = \frac{\partial^2 h_2}{\partial x^2}$ . Similarly,  $p_2$  reads as follows and terms  $A_1 = A_{22} - A_{12}$ ,  $A_2 = A_{11} + A_{S2} - A_{S1} - A_{12}$  and  $A_3 = A_{S2} - A_{12}$ , respectively.

$$p_2 = p_0 - K_f \left(\frac{\partial \theta}{\partial z}\right)^2 - \gamma_2 h_{2xx} - \Pi_2 \text{ and} \\ \Pi_2 = -\frac{A_1}{6\pi(h_2 - h_1)^3} + \frac{A_3}{6\pi h_2^3} + \frac{K_f \theta^2}{2(h_2 - h_1)^2} - \frac{K_f C_{LC} \theta}{(h_2 - h_1)} \quad (C51)$$

where,  $C_{LC} = \frac{\Delta \theta}{h_3}$  is a constant and obtained from the angular momentum balance equation. The binary Hamaker constants are calculated using the surface tensions. As mentioned in the main manuscript,  $A_{lm} = 12\pi d_0^2(\gamma_l + \gamma_m - \gamma_{lm})$ , where,  $d_0$  ( $\sim 0.157$  nm) is the van der Waals cut-off distance between the two surfaces and  $\gamma_{lm} = \gamma_l + \gamma_m - 2\sqrt{\gamma_l \gamma_m}$ .

Thus, the double differentiation of Eq's. (C50, C51) lead to following forms,

$$P_{1xx} = -\gamma_2 h_{2xxxx} - \gamma_{12} h_{1xxxx} - \frac{A_2}{2\pi h_1^4} h_{1xx} + \frac{A_3}{2\pi h_2^4} h_{2xx} \quad (C52)$$

$$P_{2LCxx} = -\gamma_2 h_{2xxxx} - \frac{A_1}{2\pi(h_2 - h_1)^4} (h_{2xx} - h_{1xx}) + \frac{A_3}{2\pi h_2^4} h_{2xx} \\ + \frac{K_f((\Delta \theta)^2 - (\theta)^2)}{(h_2 - h_1)^3} (h_{2xx} - h_{1xx}) \quad (C53)$$

Inserting above equations in kinematic conditions for the respective layer results in the following equations.

$$h_{1t} - P_{2LCxx} \left( \frac{h_1^2 h_2 - h_1^3}{2\mu_1} \right) - P_{1xx} \left( \frac{h_1^3}{2\mu_1} \right) = 0 \quad (\text{C54})$$

$$\begin{aligned} & h_{2t} - P_{1xx} \left( \frac{h_1^2 h_2 - h_1^3}{2\mu_1} + \frac{h_1^3}{3\mu_1} \right) \\ & - P_{2LCxx} \left( \frac{h_1^2 h_2 - h_1^3}{2\mu_1} + \frac{h_1^3 - 2h_1^2 h_2 + h_2^2 h_1}{\mu_1} + \left( \frac{h_1 - h_2}{\theta_1 - \theta_2} \right)^3 \frac{I_1}{\mu_2} \right) \\ & = 0 \end{aligned} \quad (\text{C55})$$

The introduction of normal modes in the above equations give,

$$\tilde{h}_1 \omega + \tilde{h}_2 A' + \tilde{h}_1 B' = 0 \quad (\text{C56})$$

$$\tilde{h}_2 \omega + \tilde{h}_2 C' + \tilde{h}_1 D' = 0 \quad (\text{C57})$$

Algebraic operation on Eq's (36, 37) gives the dispersion relation in the form given below.

$$\omega = \frac{-(B' + C') \pm \sqrt{(B' - C')^2 + 4A'D'}}{2} \quad (\text{C58})$$

where,  $A', B', C', D'$  are coefficients and given in **Section B(ii)** of the main manuscript.
